# Supplementary material for: Preparation of Au-RGO/TiO2 nanotubes and study on the photocatalytic degradation of ciprofloxacin
Source: Royal Society of Chemistry journal article supplement (doi:10.1039/d2ay01497a), 2023-01-01
Supplement: d2ay01497a1.pdf [file d2ay01497a1.pdf]

Check CIF reports for any crystal structures.

It doesn't have any crystal structure
